# Supplementary material for: A Selective ALDH1A3 Inhibitor Impairs Mesothelioma 3-D Multicellular Spheroid Growth and Neutrophil Recruitment
Source: MDPI journal article supplement (doi:10.3390/ijms24076689), 2023-04-03

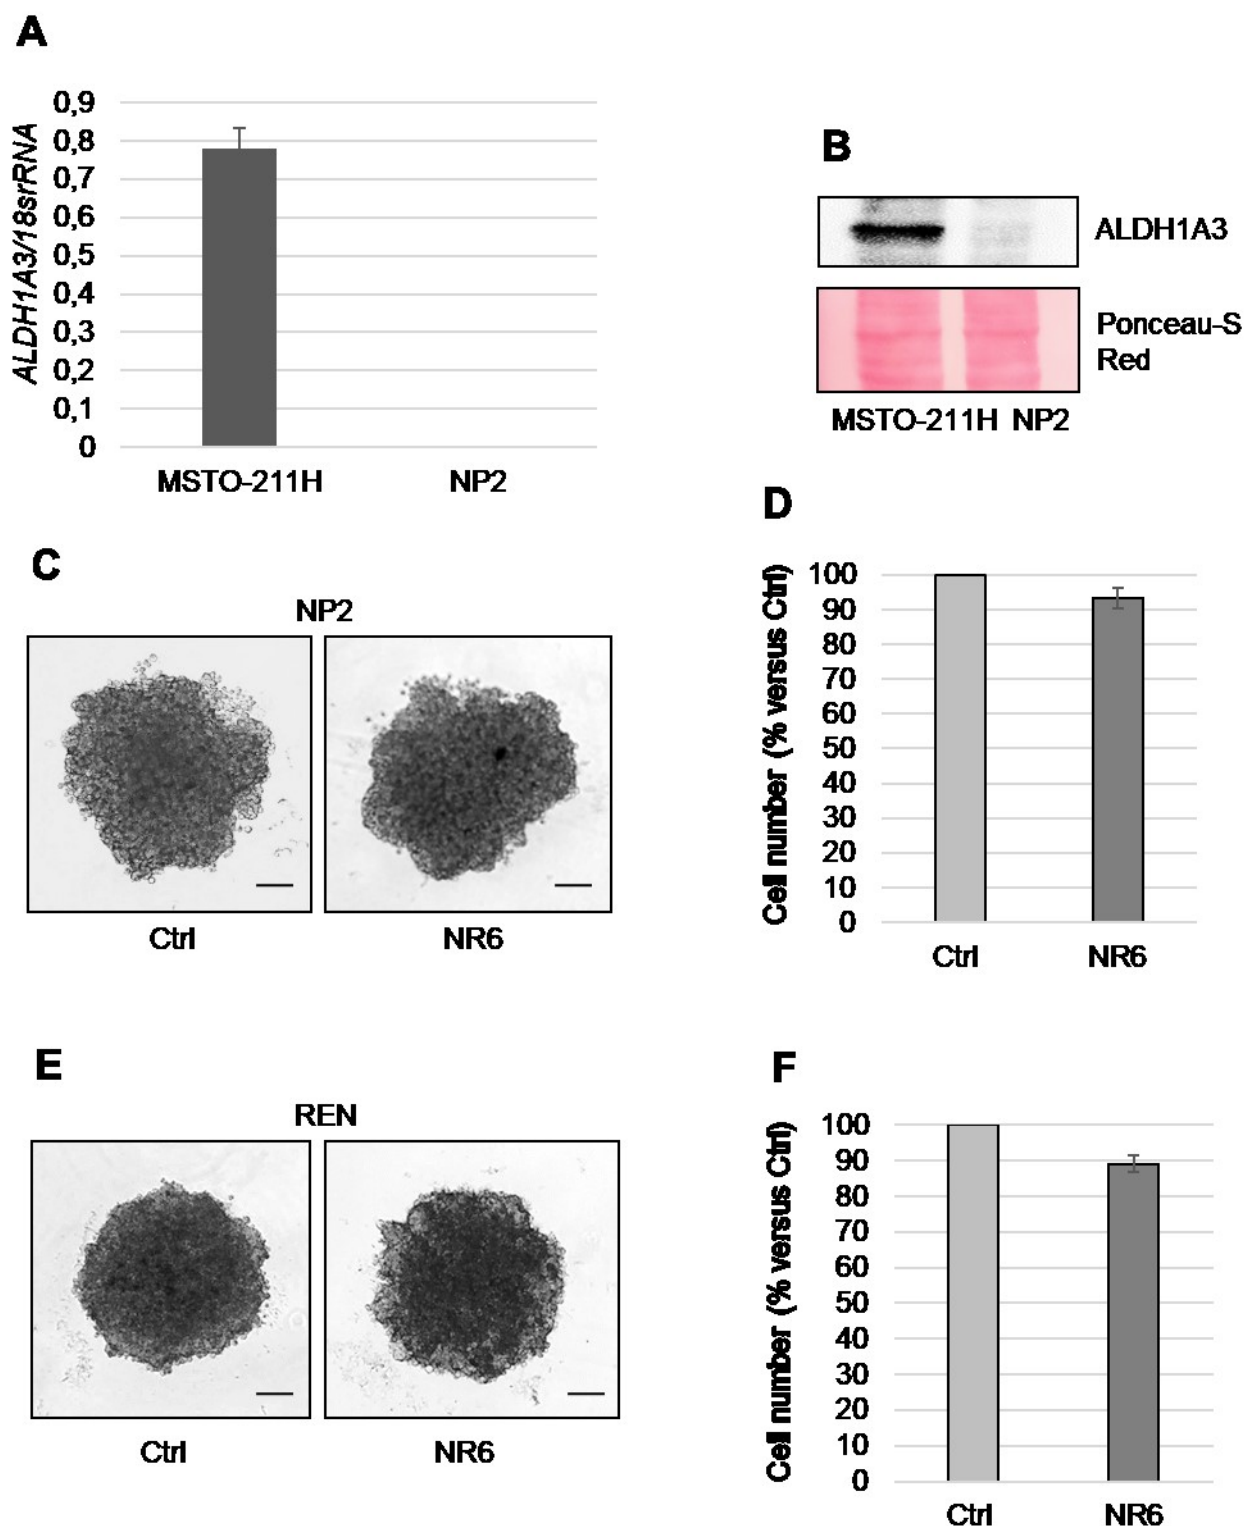

**Figure S1.** Response of ALDH1A3 negative MPM REN and mesothelial NP2 cells to NR6 treatment. (A) Bar graph shows *ALDH1A3* mRNA expression evaluated by real time-PCR in MSTO-211H and NP2 MCSs, at 72 hours. Data are expressed as *ALDH1A3* mRNA/18S rRNA ratio. (B) Representative Western Blot analysis of ALDH1A3 expression in MSTO-211H and NP2 MCSs, at 72 hours. Whole cell proteins were visualized by Ponceau-S Red staining. (C) Representative phase contrast images (x40 magnification) of NP2 cells cultured as MCSs +/- NR6 treatment, for 72 hours. Scale bar = 100  $\mu$ m. (D) Bar graph shows the number of viable cells in NP2 MCSs treated, 72 hours, with NR6 represented as percentage versus untreated control MCSs (Ctrl). (E) Representative phase contrast images (x40 magnification) of REN cells cultured as MCSs +/- NR6 treatment, for 72 hours. Scale bar = 100  $\mu$ m. (F) Bar graph shows the number of viable cells in REN MCSs treated, 72 hours, with NR6 represented as percentage versus untreated control MCSs (Ctrl). In all graphs reported in Figure S1, each bar represents mean  $\pm$  s.d. of three independent experiments.

## LC-HRMS analysis

|                  |                                                                                                               |
|------------------|---------------------------------------------------------------------------------------------------------------|
| Instrumentation: | Hybrid quadrupole-orbitrap, Thermo Scientific Q-exactive <i>Plus</i> , equipped with a Vanquish UHPLC system. |
| Column:          | Kinetex C18 (150 × 2.1 mm, 2.6 μm $d_p$ ) + C18 RP-Security Guard™ (Phenomenex).                              |
| Mobile Phase     | Phase A: 0.1% formic acid in water UHPLC grade.<br>Phase B: 0.1% formic acid in methanol UHPLC grade.         |
| Analysis mode:   | Gradient of concentration.                                                                                    |

| Time (min) | % B |
|------------|-----|
| 0,00       | 20  |
| 8,00       | 90  |
| 11,50      | 90  |
| 12,00      | 20  |
| 17,00      | 20  |

|                     |              |
|---------------------|--------------|
| Flow rate:          | 0.250 mL/min |
| Column temperature: | 40 °C        |
| Sample temperature: | 15 °C        |
| Injected volume:    | 10 μL        |

The operating conditions of the HESI were as follows:

| Parameter                              | Value              |
|----------------------------------------|--------------------|
| sheath gas flow rate (N <sub>2</sub> ) | 45 Auxiliary Units |
| auxiliary gas flow rate                | 10 Auxiliary Units |
| sweep gas flow rate                    | 0 Auxiliary Units  |
| spray voltage                          | 3.50 kV            |
| capillary temperature                  | 300 °C             |
| auxiliary gas heater temperature       | 280 °C             |

Data were acquired in positive full scan e parallel reaction monitoring (PRM) modes:

| Full scan  | Value  |
|------------|--------|
| Microscan  | 1      |
| Resolution | 70,000 |
| AGC target | 3e6    |

| PRM (MS <sup>2</sup> ) | Value          |
|------------------------|----------------|
| Microscan              | 1              |
| Resolution             | 35,000         |
| AGC target             | 1e5            |
| Maximum IT             | 120 ms         |
| Loop count             | 1              |
| MSX count              | 1              |
| Isolation wind.        | 2.0 <i>m/z</i> |
| Isolation offset       | 0.5 <i>m/z</i> |
| NCE                    | 30, 60, 90     |

LC-HRMS chromatogram and MS<sup>2</sup> spectrum of MDA derivatized with DCHD

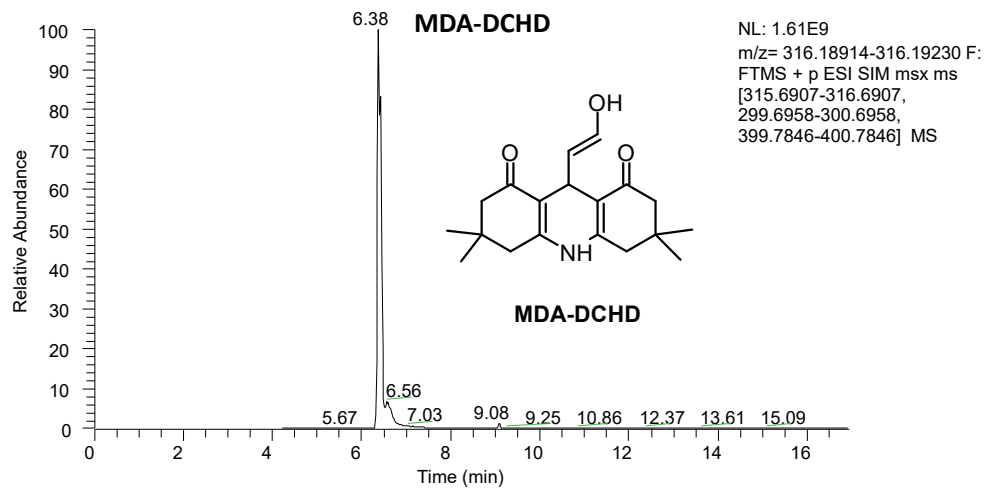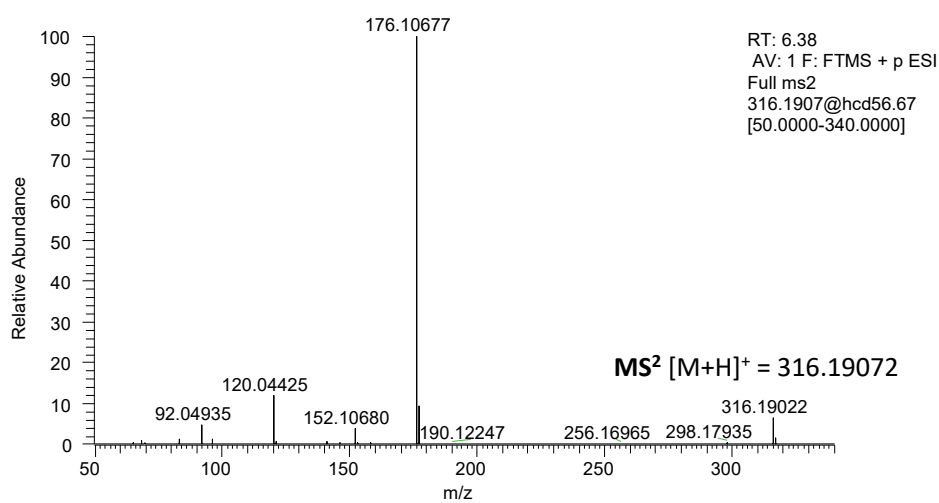

Supplement: s1 [file s1]
